# Supplementary material for: Sociodemographic and behavioural correlates of lifetime number of sexual partners: findings from the English Longitudinal Study of Ageing
Source: PubMed Central journal article supplement — BMJ Sex Reprod Health. 2019 Mar 4;45(2):138–46. doi: 10.1136/bmjsrh-2018-200230 (PMC6579508; doi:10.1136/bmjsrh-2018-200230), 2019-03-04
Supplement: bmjsrh-2018-200230supp001.pdf [file bmjsrh-2018-200230supp001.pdf]

**Supplementary Table 1** Multivariable models testing independent associations between predictors and lifetime number of sexual partners in men (excluding those with 0 sexual partners)

|                                        | Adjusted OR [95% CI] <sup>1</sup> |                       |                        |
|----------------------------------------|-----------------------------------|-----------------------|------------------------|
|                                        | 2-4<br>(n=786) <sup>2</sup>       | 5-9<br>(n=491)        | ≥10<br>(n=486)         |
| Age                                    | 0.96 [0.95-0.97]***               | 0.94 [0.92-0.95]***   | 0.92 [0.91-0.94]***    |
| Partnership status <sup>3</sup>        |                                   |                       |                        |
| Separated/divorced                     | 5.52 [2.81-10.81]***              | 14.51 [7.44-28.29]*** | 22.69 [11.70-43.99]*** |
| Widowed                                | 1.85 [1.24-2.80]**                | 1.46 [0.84-2.54]      | 1.58 [0.86-2.87]       |
| Single/never married                   | 2.89 [1.57-5.31]**                | 4.11 [2.20-7.69]***   | 6.46 [3.52-11.84]***   |
| Sexual orientation <sup>4</sup>        |                                   |                       |                        |
| Bisexual                               | 0.87 [0.48-1.58]                  | 0.76 [0.39-1.48]      | 1.10 [0.59-2.05]       |
| Homosexual                             | 1.27 [0.17-9.67]                  | 0.78 [0.08-7.77]      | 11.00 [1.83-66.04]**   |
| Non-white ethnicity <sup>5</sup>       | 1.03 [0.67-1.60]                  | 1.10 [0.67-1.81]      | 0.85 [0.49-1.46]       |
| Wealth quintile <sup>6</sup>           |                                   |                       |                        |
| 2                                      | 0.56 [0.37-0.83]**                | 0.51 [0.32-0.79]**    | 0.32 [0.21-0.50]***    |
| 3                                      | 0.78 [0.53-1.17]                  | 0.66 [0.42-1.05]      | 0.40 [0.25-0.64]***    |
| 4                                      | 0.81 [0.54-1.21]                  | 0.89 [0.56-1.39]      | 0.51 [0.32-0.81]**     |
| 5 (richest)                            | 0.68 [0.45-1.04]                  | 0.99 [0.62-1.58]      | 0.76 [0.48-1.20]       |
| Smoking status <sup>7</sup>            |                                   |                       |                        |
| Former smoker                          | 0.58 [0.37-0.89]*                 | 1.25 [0.82-1.91]      | 1.64 [1.08-2.50]*      |
| Current smoker                         | 0.89 [0.61-1.30]                  | 1.98 [1.34-2.91]**    | 2.17 [1.46-3.22]***    |
| Alcohol intake <sup>8</sup>            |                                   |                       |                        |
| Regularly                              | 1.10 [0.81-1.49]                  | 1.54 [1.05-2.25]*     | 2.04 [1.36-3.06]**     |
| Frequently                             | 1.32 [0.96-1.81]                  | 2.30 [1.55-3.39]***   | 3.23 [2.13-4.90]***    |
| Physical activity <sup>9</sup>         |                                   |                       |                        |
| Moderately active at least once a week | 0.93 [0.69-1.27]                  | 1.16 [0.81-1.67]      | 0.66 [0.46-0.95]*      |
| Vigorously active at least once a week | 1.21 [0.86-1.69]                  | 1.47 [0.99-2.19]      | 1.04 [0.70-1.53]       |
| Limiting long-standing illness         | 0.84 [0.66-1.08]                  | 1.16 [0.87-1.54]      | 1.13 [0.84-1.53]       |

<sup>1</sup> Multivariable multinomial logistic regression was performed. 0-1 sexual partners was the reference group in all analyses (n=736).

<sup>2</sup> Unweighted sample sizes. Models were performed on complete cases and as such the analysed sample number differs from the number included in the bivariate analyses.

<sup>3</sup> Reference category: married/cohabiting.

<sup>4</sup> Reference category: heterosexual.

<sup>5</sup> Reference category: white.

<sup>6</sup> Reference category: 1 (poorest).

<sup>7</sup> Reference category: never smoker.

<sup>8</sup> Reference category: never/rarely.

<sup>9</sup> Reference category: inactive.

All figures are weighted for sampling probabilities and differential non-response.

OR = odds ratio; CI = confidence interval.

\*  $p < .05$ , \*\*  $p < .01$ , \*\*\*  $p < .001$ .

**Supplementary Table 2** Multivariable models testing independent associations between predictors and lifetime number of sexual partners in women (excluding those with 0 sexual partners)

|                                        | Adjusted OR [95% CI] <sup>1</sup> |                       |                       |
|----------------------------------------|-----------------------------------|-----------------------|-----------------------|
|                                        | 2-4<br>(n=1170) <sup>2</sup>      | 5-9<br>(n=486)        | ≥10<br>(n=243)        |
| Age                                    | 0.95 [0.93-0.96]***               | 0.90 [0.89-0.92]***   | 0.90 [0.88-0.92]***   |
| Partnership status <sup>3</sup>        |                                   |                       |                       |
| Separated/divorced                     | 7.55 [5.17-11.04]***              | 13.73 [8.97-21.03]*** | 15.68 [9.60-25.62]*** |
| Widowed                                | 1.72 [1.32-2.25]***               | 1.65 [1.07-2.54]*     | 1.38 [0.72-2.65]      |
| Single/never married                   | 2.32 [1.34-4.02]**                | 3.41 [1.84-6.32]***   | 8.35 [4.36-16.00]***  |
| Sexual orientation <sup>4</sup>        |                                   |                       |                       |
| Bisexual                               | 1.17 [0.73-1.88]                  | 2.23 [1.33-3.73]**    | 6.26 [3.68-10.65]***  |
| Homosexual                             | 7.20 [0.66-78.96]                 | 10.40 [0.78-138.25]   | 8.86 [0.53-148.76]    |
| Non-white ethnicity <sup>5</sup>       | 0.32 [0.19-0.53]***               | 0.19 [0.09-0.41]***   | 0.09 [0.03-0.30]***   |
| Wealth quintile <sup>6</sup>           |                                   |                       |                       |
| 2                                      | 0.93 [0.68-1.27]                  | 0.77 [0.51-1.17]      | 0.82 [0.49-1.36]      |
| 3                                      | 0.98 [0.72-1.34]                  | 0.82 [0.53-1.25]      | 0.92 [0.54-1.56]      |
| 4                                      | 0.78 [0.56-1.09]                  | 0.99 [0.65-1.53]      | 0.66 [0.37-1.19]      |
| 5 (richest)                            | 0.81 [0.58-1.14]                  | 1.04 [0.67-1.61]      | 1.06 [0.60-1.86]      |
| Smoking status <sup>7</sup>            |                                   |                       |                       |
| Former smoker                          | 1.26 [0.84-1.89]                  | 1.96 [1.24-3.09]**    | 2.51 [1.46-4.34]**    |
| Current smoker                         | 1.57 [1.15-2.14]**                | 1.98 [1.36-2.90]***   | 3.19 [2.05-4.96]***   |
| Alcohol intake <sup>8</sup>            |                                   |                       |                       |
| Regularly                              | 1.20 [0.96-1.51]                  | 2.16 [1.55-3.01]***   | 1.14 [0.76-1.72]      |
| Frequently                             | 1.64 [1.26-2.15]***               | 3.31 [2.28-4.80]***   | 2.30 [1.46-3.62]***   |
| Physical activity <sup>9</sup>         |                                   |                       |                       |
| Moderately active at least once a week | 1.45 [1.13-1.85]**                | 1.19 [0.85-1.67]      | 1.53 [0.99-2.38]      |
| Vigorously active at least once a week | 1.53 [1.14-2.06]**                | 1.64 [1.12-2.41]*     | 1.58 [0.94-2.63]      |
| Limiting long-standing illness         | 1.15 [0.93-1.42]                  | 1.59 [1.20-2.10]**    | 1.64 [1.14-2.36]**    |

<sup>1</sup> Multivariable multinomial logistic regression was performed. 0-1 sexual partners was the reference group in all analyses (n=1166).

<sup>2</sup> Unweighted sample sizes. Models were performed on complete cases and as such the analysed sample number differs from the number included in the bivariate analyses.

<sup>3</sup> Reference category: married/cohabiting.

<sup>4</sup> Reference category: heterosexual.

<sup>5</sup> Reference category: white.

<sup>6</sup> Reference category: 1 (poorest).

<sup>7</sup> Reference category: never smoker.

<sup>8</sup> Reference category: never/rarely.

<sup>9</sup> Reference category: inactive.

All figures are weighted for sampling probabilities and differential non-response.

OR = odds ratio; CI = confidence interval.

\*  $p < .05$ , \*\*  $p < .01$ , \*\*\*  $p < .001$ .
